# Supplementary material for: Feeding a Mixture of Choline Forms during Lactation Improves Offspring Growth and Maternal Lymphocyte Response to Ex Vivo Immune Challenges
Source: MDPI journal article supplement (doi:10.3390/nu9070713), 2017-07-07

**Table S1.** Fatty acid composition of experimental diets

| Fatty acid                     | Control | MC   | HGPC |
|--------------------------------|---------|------|------|
| g/100 g of total fatty acids   |         |      |      |
| C16:0                          | 8.5     | 8.5  | 8.0  |
| C16:1 n9                       | 0.2     | 0.2  | 0.2  |
| C18:0                          | 24.5    | 26.3 | 24.8 |
| C18:1 n9                       | 31.8    | 31.4 | 32.4 |
| C18:2 n6                       | 29.3    | 28.3 | 28.9 |
| C20:0                          | 1.0     | 0.9  | 0.9  |
| C18:3 n3 (ALA)                 | 2.8     | 3.0  | 3.3  |
| C20:3 n6                       | 0.3     | 0.3  | 0.3  |
| C20:4 n6 (AA)                  | 0.3     | 0.3  | 0.3  |
| C22:6 n3 (DHA)                 | 0.3     | 0.3  | 0.3  |
| Other fatty acids <sup>2</sup> | 1.9     | 1.8  | 2.1  |
| Total SFA                      | 33.1    | 34.9 | 32.9 |
| Total PUFA                     | 33.2    | 31.9 | 32.7 |
| Total n-6                      | 29.5    | 28.6 | 29.2 |
| Total n-3                      | 3.6     | 3.3  | 3.6  |
| Total MUFA                     | 31.8    | 31.4 | 32.4 |
| n-6/n-3                        | 8.1     | 8.8  | 8.2  |
| PUFA/SFA                       | 1.0     | 0.9  | 1.0  |

<sup>1</sup> Analysis of the fat mixture added to experimental diets determined by gas liquid chromatography; AA, arachidonic acid; ALA,  $\alpha$ -linolenic acid; DHA, docosahexaenoic acid; MUFA, monounsaturated fatty acids; n, omega; PUFA, polyunsaturated fatty acids; SFA, saturated fatty acids;

<sup>2</sup> other fatty acids refer to fatty acids that contributed for less than 0.2% in the diet which included trace of 10:0, 12:0, 14:0, 15:0, 18:1c11, 20:2n-6, 20:5n-3, 22:0, 22:4n-6 and 22:5n-3.

**Table S2.** Total choline content and relative contribution of the different forms of choline in the stomach contents of offspring at 3 weeks of age from lactating dams fed Free Choline (FC; 100% FC), Mixed Choline (MC; 50% FC, 25% GPC, 25% GPC) or High GPC (HGPC; 75% GPC, 12.5% PC, 12.5% FC) diets

|                                          | FC<br>(n=6)                 | MC (n=6)                     | HGPC (n=6)                  | <i>P</i> value |
|------------------------------------------|-----------------------------|------------------------------|-----------------------------|----------------|
| <b>Total choline content (mg/100g)</b>   | 19.6 $\pm$ 1.5              | 17.9 $\pm$ 1.3               | 20.3 $\pm$ 2.6              | 0.657          |
| <b>Contribution to total choline (%)</b> |                             |                              |                             |                |
| Free choline                             | 19.3 $\pm$ 3.3 <sup>a</sup> | 12.9 $\pm$ 2.2 <sup>a</sup>  | 5.8 $\pm$ 1.3 <sup>b</sup>  | 0.002          |
| LysoPC                                   | 11.7 $\pm$ 1.9              | 17.5 $\pm$ 3.4               | 13.3 $\pm$ 2.1              | 0.420          |
| PC                                       | 6.4 $\pm$ 0.9 <sup>b</sup>  | 18.2 $\pm$ 5.3 <sup>a</sup>  | 9.4 $\pm$ 0.7 <sup>ab</sup> | 0.006          |
| GPC                                      | 32.0 $\pm$ 4.4 <sup>b</sup> | 41.7 $\pm$ 4.8 <sup>ab</sup> | 53.5 $\pm$ 2.2 <sup>a</sup> | 0.005          |
| Phosphocholine                           | 18.7 $\pm$ 3.4 <sup>a</sup> | 7.1 $\pm$ 1.7 <sup>b</sup>   | 9.9 $\pm$ 2.7 <sup>b</sup>  | 0.022          |
| Sphingomyelin                            | 9.1 $\pm$ 1.3               | 6.1 $\pm$ 1.8                | 8.1 $\pm$ 1.1               | 0.326          |

GPC, glycerophosphocholine; LysoPC, lysophosphatidylcholine; PC, phosphatidylcholine  
*P* value of the main effect of diet analyzed by one-way ANOVA. Multiple comparisons between diet groups have been performed with Duncan adjustment.

**Table S3.** Total number of T and B lymphocyte populations in the spleen and mesenteric lymph nodes of lactating dams fed Control (100% FC), Mixed Choline (MC; 50% PC, 25% FC, 25% GPC) or High GPC (HGPC; 75% GPC, 12.5% PC, 12.5% FC) diets

| Cell phenotype                                                                              | Control<br>(n=6) | MC<br>(n=6) | HGPC<br>(n=6) | <i>P</i> value |
|---------------------------------------------------------------------------------------------|------------------|-------------|---------------|----------------|
| <b>Total number of immune cells (x10<sup>6</sup>) in spleen<sup>1</sup></b>                 |                  |             |               |                |
| Total CD3+ (T cell)                                                                         | 87.6 ± 4.2       | 76.5 ± 5.5  | 97.5 ± 13.4   | 0.266          |
| CD3+CD4+                                                                                    | 51.8 ± 2.2       | 43.4 ± 3.0  | 49.0 ± 6.4    | 0.389          |
| CD3+CD8+                                                                                    | 30.5 ± 1.7       | 24.5 ± 2.0  | 34.3 ± 3.9    | 0.064          |
| Total CD45RA+ (B cells)                                                                     | 62.7 ± 2.8       | 71.8 ± 5.4  | 91.0 ± 12.8   | 0.075          |
| <b>Total number of immune cells (x10<sup>6</sup>) in mesenteric lymph nodes<sup>1</sup></b> |                  |             |               |                |
| Total CD3+ (T cell)                                                                         | 14.2 ± 1.6       | 19.0 ± 1.8  | 15.2 ± 2.0    | 0.189          |
| CD3+CD4+                                                                                    | 9.8 ± 1.1        | 13.3 ± 1.4  | 10.0 ± 1.4    | 0.131          |
| CD3+CD8+                                                                                    | 3.7 ± 0.5        | 4.9 ± 0.6   | 3.5 ± 0.8     | 0.277          |
| Total CD45RA+ (B cells)                                                                     | 15.1 ± 8.1       | 11.5 ± 0.8  | 8.4 ± 1.0     | 0.620          |

GPC, glycerophosphocholine; LysoPC, lysophosphatidylcholine; PC, phosphatidylcholine

<sup>1</sup>The total number of immune cells (x10<sup>6</sup>) in each tissue (spleen or mesenteric lymph nodes) was calculated by multiplying the percentage of the immune cell phenotype by the total number of splenocytes (or mesenteric lymphocytes) isolated (x10<sup>6</sup>) /100.

Values are presented as mean ± SEM. *P* value of the main effect of diet analyzed by one-way ANOVA. Multiple comparisons between diet groups have been performed with Duncan adjustment.

**Table S4.** Cytokine production by mesenteric lymphocytes after *ex vivo* stimulation with LPS from lactating dams fed Free Choline (FC; 100% FC), Mixed Choline (MC; 50% PC, 25% FC, 25% GPC) or High GPC (HGPC; 75% GPC, 12.5% PC, 12.5% FC) diets

|        | FC<br>(n=6) | MC (n=6) | HGPC (n=6) | <i>P</i> value |
|--------|-------------|----------|------------|----------------|
| IL-1-β | 107 ± 21    | 147 ± 14 | 97 ± 15    | 0.070          |
| IL-6   | 111 ± 10    | 100 ± 9  | 90 ± 37    | 0.481          |
| IL-10  | 128 ± 13    | 171 ± 21 | 122 ± 20   | 0.249          |
| TNF-α  | 114 ± 20    | 152 ± 12 | 114 ± 16   | 0.172          |

IL, interleukin; LPS, lipopolysaccharide; TNF, tumor necrosis factor

Values are presented as mean ± SEM. *P* value of the main effect of diet analyzed by one-way ANOVA. Multiple comparisons between diet groups have been performed with Duncan adjustment.

**Figure S1.** IL-2 production by splenocytes after *ex vivo* stimulation with Concanavalin A (ConA) from lactating dams fed Control (100% FC), Mixed Choline (MC; 50% PC, 25% FC, 25% GPC) or High GPC (HGPC; 75% GPC, 12.5% PC, 12.5% FC) diets

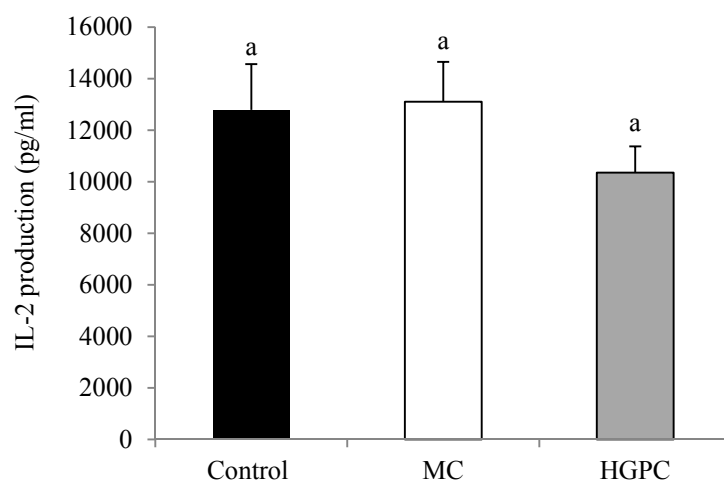

Supplement: s1 [file s1]
